# Supplementary material for: Rainwater isotopic composition variability during extremely rainy years in the São Francisco River headwaters, southeastern Brazil
Source: Research Square preprint supplement (doi:10.21203/rs.3.rs-8555216/v1), 2026-01-16
Supplement: Supplementary file 1 [file eedc0ec697ad8784f5ee20e1.docx]

Table 1 – Monthly averages of meteorological data at SCN (2021–2024). R = rainfall; T = temperature; R.U. = relative humidity.

|  |  | **R**  **(mm)** | **T**  **(°C)** | **R.U.**  **(%)** |
| --- | --- | --- | --- | --- |
| **2021** | **S** | 10 | 22.78 | 60.97 |
|  | **O** | 364.5 | 20.73 | 86.55 |
|  | **N** | 306 | 21.00 | 83.77 |
|  | **D** | 352.5 | 20.66 | 88.61 |
| **2022** | **J** | 572.5 | 21.61 | 83.61 |
|  | **F** | 349 | 20.96 | 84.82 |
|  | **M** | 75 | 21.85 | 80.52 |
|  | **A** | 123 | 21.00 | 81.33 |
|  | **M** | 77 | 17.37 | 76.06 |
|  | **J** | 7 | 17.58 | 73.87 |
|  | **J** | 0 | 17.71 | 67.58 |
|  | **A** | 16 | 18.52 | 72.90 |
|  | **S** | 35.5 | 20.35 | 70.73 |
|  | **O** | 114 | 21.60 | 80.32 |
|  | **N** | 242 | 19.53 | 87.55 |
|  | **D** | 487.5 | 19.92 | 87.13 |
| **2023** | **J** | 525.5 | 20.75 | 88.15 |
|  | **F** | 255.5 | 21.84 | 86.46 |
|  | **M** | 78 | 21.66 | 81.84 |
|  | **A** | 156.5 | 20.35 | 83.67 |
|  | **M** | 4 | 18.27 | 76.58 |
|  | **J** | 20 | 17.05 | 74.50 |
|  | **J** | 5 | 18.24 | 82.42 |
|  | **A** | 26 | 20.03 | 77.90 |
|  | **S** | 12 | 22.90 | 71.97 |
|  | **O** | 402 | 22.85 | 81.97 |
|  | **N** | 220 | 23.30 | 71.80 |
|  | **D** | 391 | 23.05 | 83.90 |
| **2024** | **J** | 280.5 | 22.29 | 86.03 |
|  | **F** | 260 | 22.14 | 85.70 |
|  | **M** | 305 | 22.63 | 85.03 |
|  | **A** | 120 | 21.37 | 82.60 |
|  | **M** | 22 | 20.37 | 72.94 |

Table 2 – Monthly mean and standard deviation (s) of meteorological data from ARX (1994–2024). R = rainfall; T = temperature; R.U. = relative humidity.

|  | **R**  **(mm)** | **s R**  **(mm)** | **T**  **(ºC)** | **s T**  **(°C)** | **R.U.**  **(%)** | **s R.U.**  **(%)** |
| --- | --- | --- | --- | --- | --- | --- |
| **J** | 290.34 | 142.95 | 22.60 | 0.78 | 78.64 | 7.53 |
| **F** | 224.43 | 124.70 | 22.90 | 0.75 | 77.09 | 7.55 |
| **M** | 203.83 | 84.74 | 22.30 | 0.64 | 78.15 | 6.41 |
| **A** | 76.51 | 49.13 | 21.69 | 0.68 | 74.15 | 6.97 |
| **M** | 43.82 | 35.80 | 19.55 | 0.71 | 71.20 | 7.19 |
| **J** | 15.87 | 21.27 | 18.73 | 0.67 | 67.54 | 7.38 |
| **J** | 7.00 | 16.34 | 18.80 | 0.82 | 61.41 | 8.74 |
| **A** | 12.47 | 18.02 | 20.47 | 0.83 | 55.55 | 9.68 |
| **S** | 54.01 | 42.69 | 22.21 | 1.03 | 55.85 | 11.16 |
| **O** | 122.73 | 55.12 | 22.92 | 1.19 | 66.00 | 9.58 |
| **N** | 216.09 | 82.64 | 22.08 | 0.73 | 75.66 | 4.78 |
| **D** | 286.84 | 96.57 | 22.37 | 0.68 | 79.88 | 5.02 |

Table 3 – Isotopic composition of precipitation at SCN.

|  |  | **δ2H**  **( ‰)** | **δ18O**  **( ‰)** | **d-excess**  **( ‰)** |
| --- | --- | --- | --- | --- |
| **2021** | **S** | 12.15 | -0.14 | 13.30 |
|  | **O** | -7.87 | -2.79 | 14.48 |
|  | **N** | -79.53 | -12.79 | 22.76 |
|  | **D** | -76.69 | -11.97 | 19.09 |
| **2022** | **J** | -68.03 | -10.30 | 14.35 |
|  | **F** | -94.84 | -12.87 | 8.11 |
|  | **M** | -58.80 | -8.91 | 12.45 |
|  | **A** | -16.52 | -3.23 | 9.32 |
|  | **M** | -2.07 | -1.93 | 13.40 |
|  | **J** | -7.44 | -2.31 | 11.07 |
|  | **J** | 7.64 | -0.50 | 11.61 |
|  | **A** | -11.58 | -3.39 | 15.55 |
|  | **S** | -6.11 | -1.53 | 6.12 |
|  | **O** | -10.83 | -3.05 | 13.58 |
|  | **N** | -23.61 | -5.14 | 17.53 |
|  | **D** | -60.92 | -9.29 | 13.41 |
| **2023** | **J** | -81.95 | -12.09 | 14.80 |
|  | **F** | -6.52 | -2.05 | 9.86 |
|  | **M** | -2.11 | -1.61 | 10.78 |
|  | **A** | -26.89 | -4.79 | 11.43 |
|  | **M** | -3.28 | -1.64 | 9.81 |
|  | **J** | -0.94 | -1.86 | 13.97 |
|  | **J** | -2.15 | -1.53 | 10.09 |
|  | **A** | 10.73 | -0.66 | 15.99 |
|  | **S** | 9.65 | -1.00 | 17.63 |
|  | **O** | 8.20 | -0.77 | 14.36 |
|  | **N** | 2.92 | -1.34 | 13.68 |
|  | **D** | -10.83 | -2.85 | 11.96 |
| **2024** | **J** | -65.19 | -9.31 | 9.26 |
|  | **F** | -57.78 | -8.78 | 12.49 |
|  | **M** | -31.71 | -5.67 | 13.64 |
|  | **A** | -31.23 | -5.63 | 13.81 |
|  | **M** | 0.55 | -2.22 | 18.29 |

Table 4 – Mean isotopic composition of precipitation at SCN. A = annual; D = dry; R = rainy; Arith. = arithmetic; s = standard deviation; a = arithmetic; w = weighted.

|  | **Arith. mean** | | | **sa** | | | **Weighted mean** | | | **sw** | | |
| --- | --- | --- | --- | --- | --- | --- | --- | --- | --- | --- | --- | --- |
|  |
|  | **δ2H (‰)** | **δ18O (‰)** | ***d-exc*.(‰)** | **δ2H (‰)** | **δ18O (‰)** | ***d-exc*. (‰)** | **δ2H (‰)** | **δ18O (‰)** | ***d-exc*. (‰)** | **δ2H (‰)** | **δ18O (‰)** | ***d-exc*. (‰)** |
| **A** | -24.05 | -4.67 | 13.27 | 32.03 | 4.08 | 3.40 | -42.93 | -7.09 | 13.77 | 32.03 | 4.07 | 3.39 |
| **D** | 0.56 | -1.63 | 12.52 | 7.53 | 0.84 | 3.45 | -1.29 | -1.75 | 12.70 | 7.53 | 0.84 | 3.45 |
| **R** | -34.26 | -5.98 | 13.60 | 33.30 | 4.23 | 3.40 | -44.32 | -7.27 | 13.80 | 33.03 | 4.23 | 3.40 |
